# Supplementary material
Source: publisher site journal article supplement (https://www.dovepress.com/article/481225)
Supplement: Supplementary file 1 [file get_supplementary_file.php]

**Supplemental material**

**Table S1** RT-qPCR system

| Reagent | Volume |
| --- | --- |
| TB Green® Premix Ex Taq™ II | 5 μL |
| DNA | 1 μL |
| ddH2O | 3 μL |
| Primer R | 0.4 μL |
| Primer F | 0.4 μL |
| ROX | 0.2 μL |

**Table S2** The primer sequences for RT-qPCR

| Gene | Sequence（5'-3'） |
| --- | --- |
| 16S rRNA-F | TACACACCGCCCGTCACACC |
| 16S rRNA-R | CGGCTACCTTGTTACGACTTCACC |
| H2297-q-F | TTTTGCACACCGCTTTACCG |
| H2297-q-R | ACGAGCCCGACAAAAGGAAT |
| H1126-q-F | TTACTGTGGTGGCCTTTGCT |
| H1126-q-R | GGCTCCTGATCCATCGAGTT |
| H1233-q-F | AAACCGTACTAGCGGGCTTC |
| H1233-q-R | ACCAAACTTTTCTGGCGTGC |
| pgaA-q-F | CGTATGGCACTGTTCGAGGT |
| pgaA-q-R | CCCGCTTCAAAATGCTGCTT |
| H2313-q-F | ATCCGATTGATCCGCTTGCT |
| H2313-q-R | CGTTGAAGCGGCAATACCTG |
| H2766-q-F | CGCGCCAACATAAATTGCCT |
| H2766-q-R | GGTACACTTCACCCTGCACT |
| H3691-q-F | TTTGCAGCAGACTTGGAAGC |
| H3691-q-R | CACAAGCTGCTGTTTAGCGT |
| CspG-q-F | TGACAGCTCGTGAACAAGGC |
| CspG-q-R | CGATTGCACGGAAGTGAACG |
| GspG-q-F | GTGCCTCAGGCTTTACCCTT |
| GspG-q-R | CCCATGACGTTCGGTACGAT |
| PaaH-q-F | TAAGCCACCGTCATGTAGGC |
| PaaH-q-R | GCGCGTGTAAACATCACGAG |

**Note:** H is an abbreviation for HMPREF0010_0.

**Table S3** Primers for biofilm-associated genes

| Gene | Sequence（5'-3'） | Function |
| --- | --- | --- |
| CsuE-q-F | TTGTGGGAATCGGGGTGTTCTTTG | Pilus tip adhesin subunit *CsuE*[1] |
| CsuE-q-R | GAGAGTGAACCAAGCGAGTCTGC |
| BfmR-q-F | GTCGTGAAGTTCGCCCACACTATC | Two-component signal transduction system response regulator *BfmR*[2] |
| BfmR-q-R | GCACCCATTTCCAGACCAAGTACC |
| BfmS-q-F | GCAGAGCGTCGTTACCTTCACC | Two-component signal transduction system sensor kinase *BfmS*[2] |
| BfmS-q-R | ATACCGCCCGTAATCCGAACTTTG |
| Pgm-q-F | AGTGCCCACCACTATTTCCG | Phosphoglucomutase *PGM*[3] |
| Pgm-q-R | TCGTAGTTTGCGTATCGGCT |

**Table S4** Data quality table before and after quality control

| Sample | Before filtering Q30（%） | After filtering Q30（%） |
| --- | --- | --- |
| Con1 | 92.92 | 93.13 |
| Con2 | 93.08 | 93.27 |
| Con3 | 92.76 | 92.96 |
| Con4 | 92.19 | 92.44 |
| ABF1 | 90.72 | 91.24 |
| ABF2 | 89.54 | 90.59 |
| ABF3 | 92.66 | 92.94 |
| ABF4 | 92.13 | 92.41 |

**Table S5** Comparison results of each sample after sequencing data quantification

| Sample | Total reads  (clean data) | Total mapped | Multiple mapped | Uniquely mapped |
| --- | --- | --- | --- | --- |
| Con1 | 6433510 | 82.48% | 0.04% | 79.5% |
| Con2 | 7889632 | 89.98% | 0.03% | 87.07% |
| Con3 | 7918885 | 83.89% | 0.04% | 80.98% |
| Con4 | 6432234 | 86.75% | 0.02% | 83.8% |
| ABF1 | 7623586 | 72.44% | 0.02% | 69.41% |
| ABF2 | 9294046 | 79.93% | 0.02% | 76.58% |
| ABF3 | 7540588 | 73.56% | 0.01% | 70.94% |
| ABF4 | 8581624 | 78.64% | 0.01% | 75.77% |


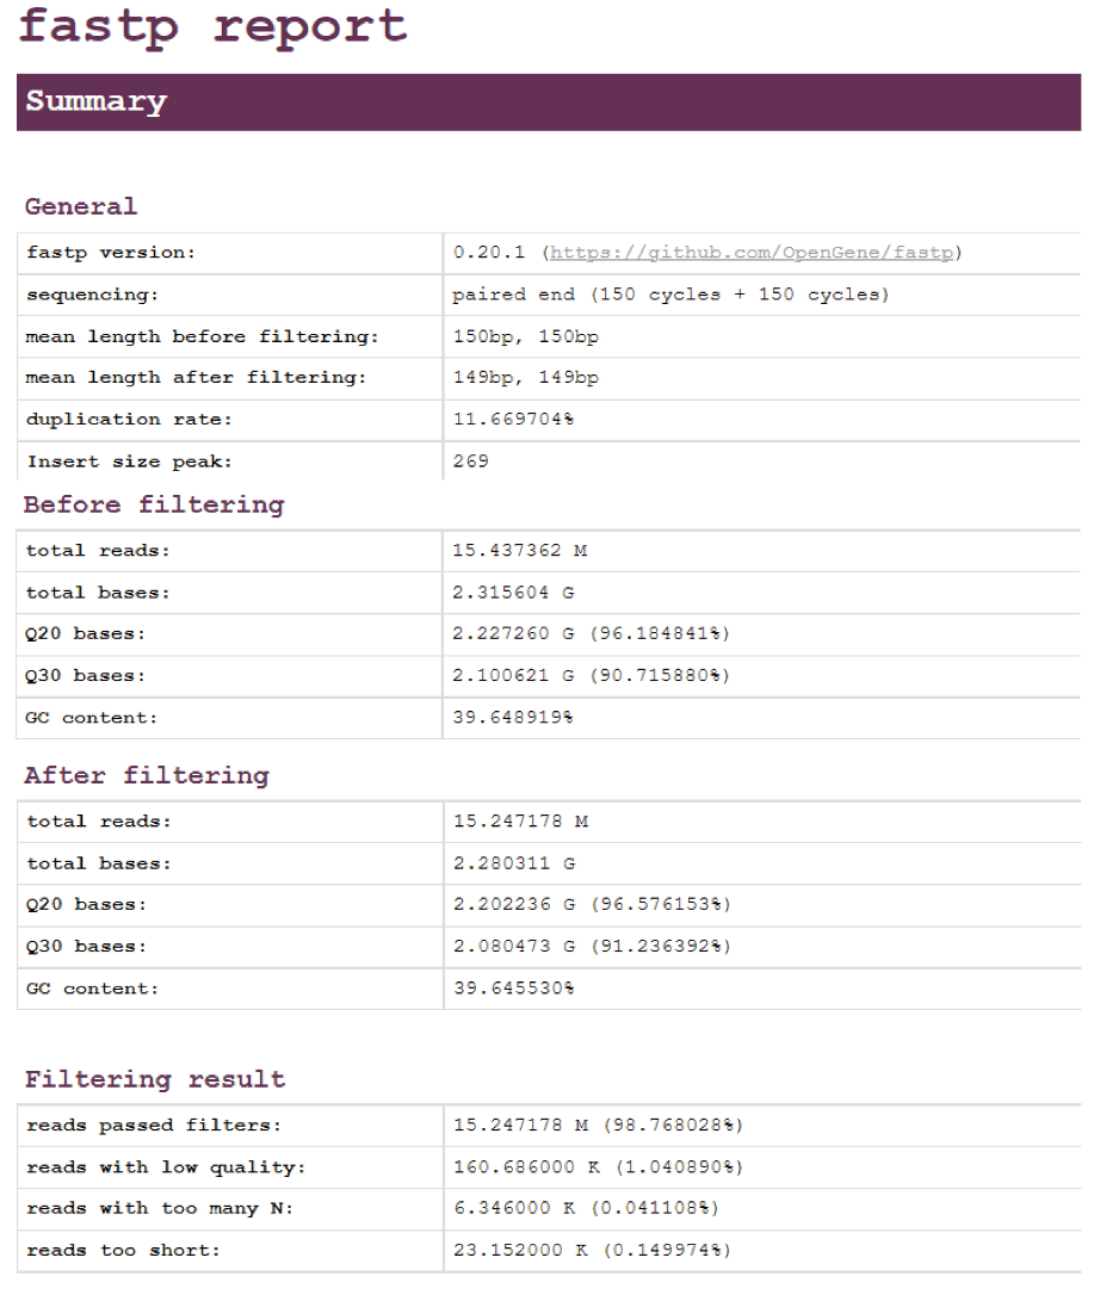


**Figure S1** Report of the filtered fastp software for ABF1 samples.

**Note:** The report contains the total number of bases before and after filtering and the quality of bases before and after filtering.


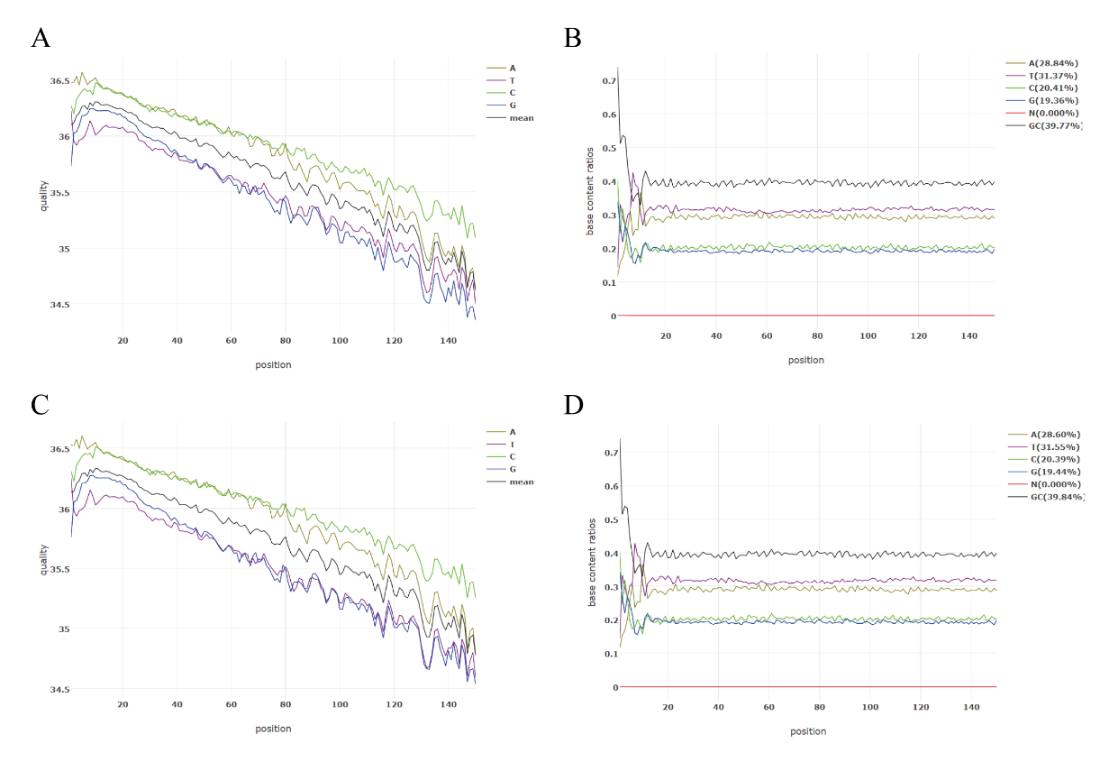


**Figure S2** Quality control results of transcriptome data of ABF1 samples. A-B are base masses and GC contents of ABF1 samples before QC filtration; C-D are base masses and GC contents of ABF1 samples after QC filtration.


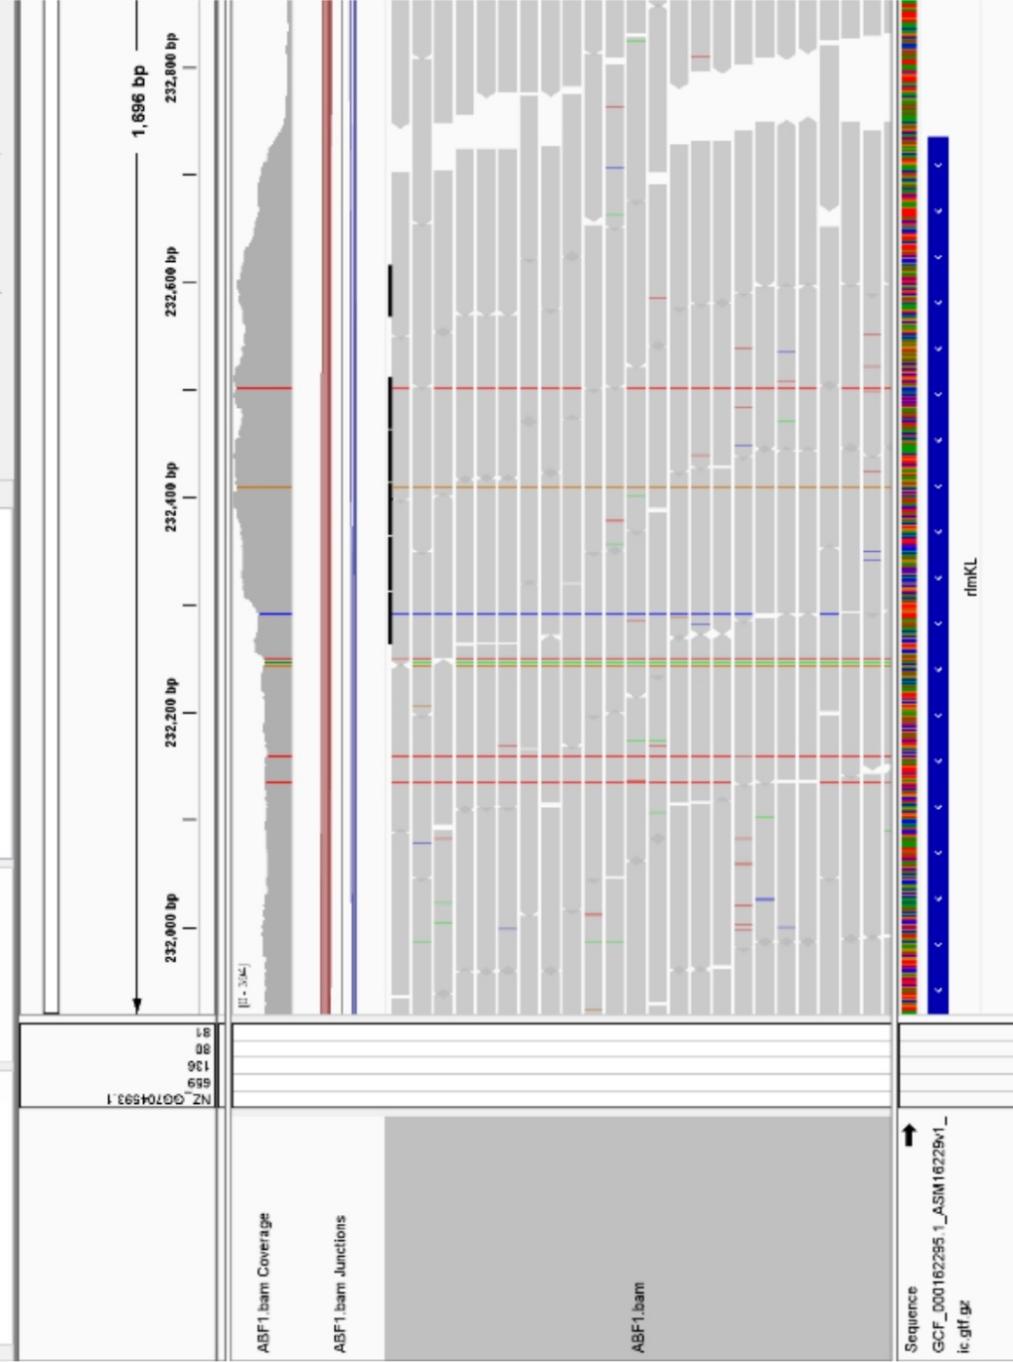


**Figure S3** Results of alignment of transcriptome sequencing data with the reference genome of strain ATCC19606. The figure shows the results of ABF1 comparison with the reference genome of *A. baumannii* ATCC19606 strain, the upper peaked shaded portion is the corresponding sequencing depth of ABF1, the lower bar is the comparison of reads, the color portion is the different types of mutations, the bottom blue portion is the amino acid sequences corresponding to the reference sequences, and the color bar above the blue color bar is indicated by the different colors of the different bases.


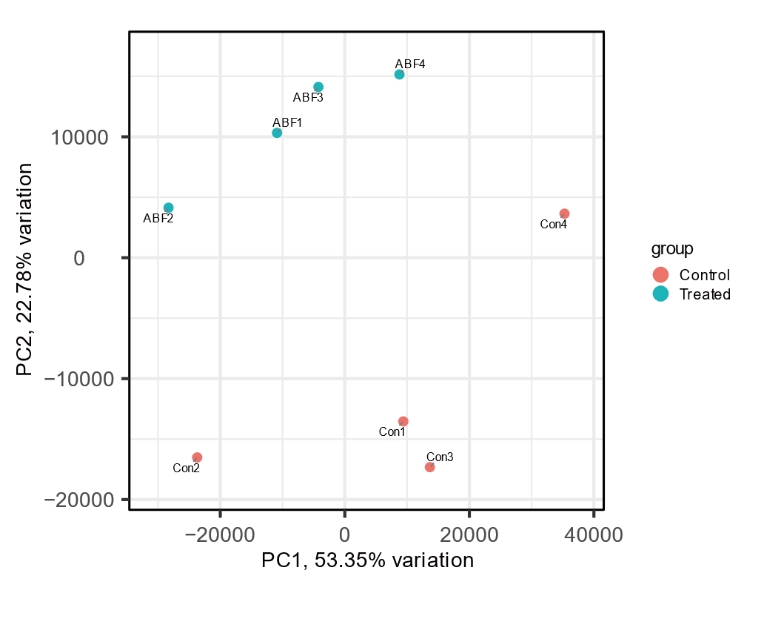


**Figure S4** PCA principal component analysis between samples.


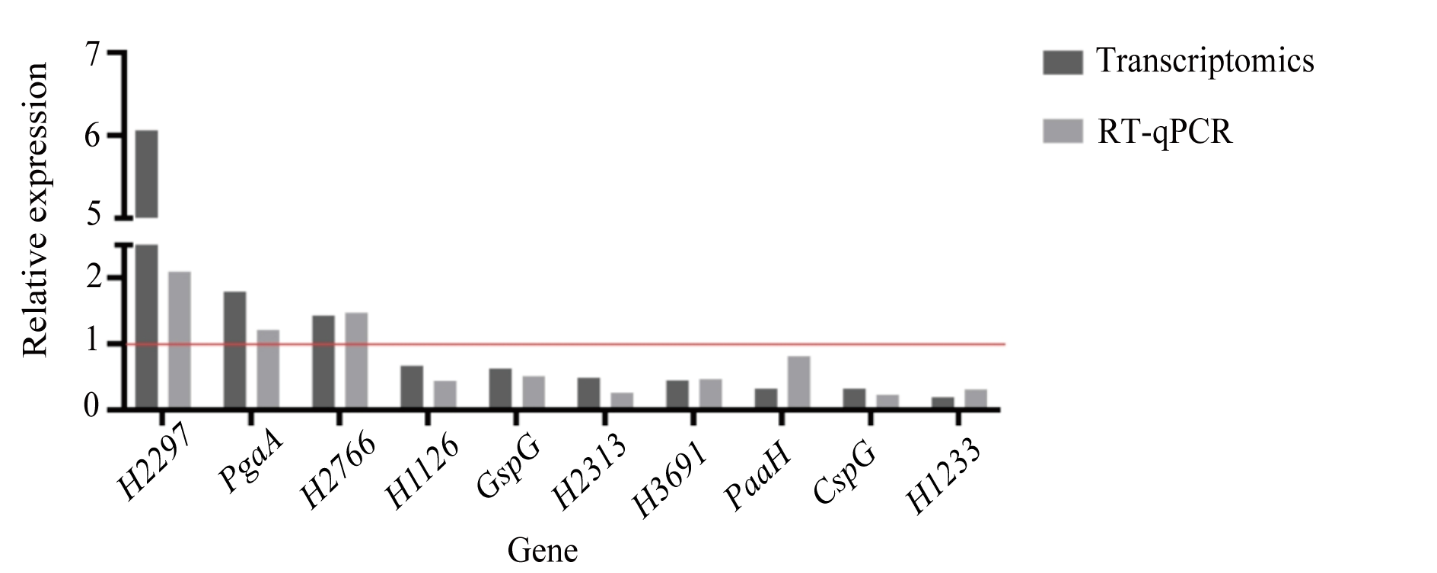


**Figure S5** RT-qPCR validation of transcriptome results. The red line in the graph is the threshold for a Fold Change of 1. Greater than 1 is considered an upward adjustment, and less than 1 is considered a downward adjustment.


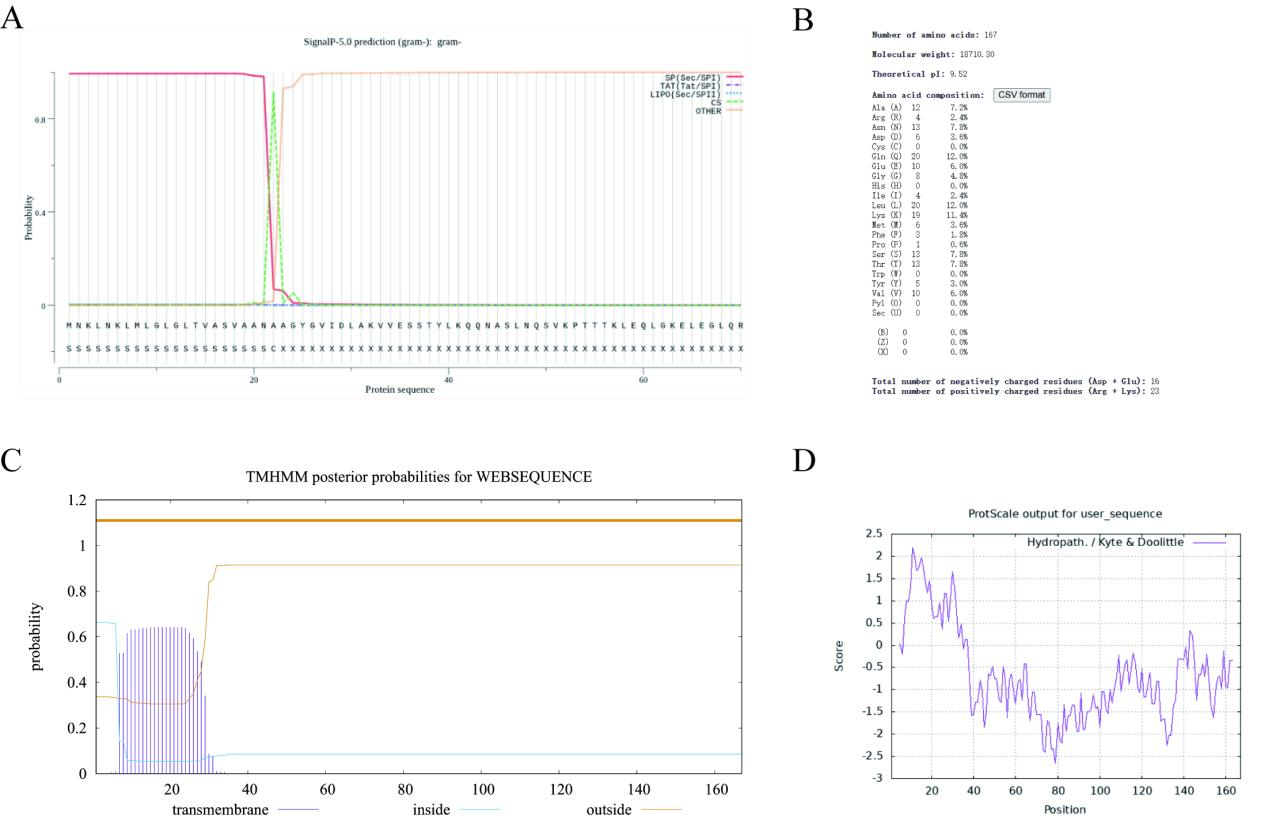


**Figure S6** Predicted physicochemical properties of OmpH. (**A**)The signal peptide region of H354 predicted by SignalP (5.0). (**B**)The molecular weight of OmpH predicted by ProtParam with positive and negatively charged amino acids. (**C**)The transmembrane region predicted by TMHMM. (**D**)The hydrophilic region predicted by ProtScale.


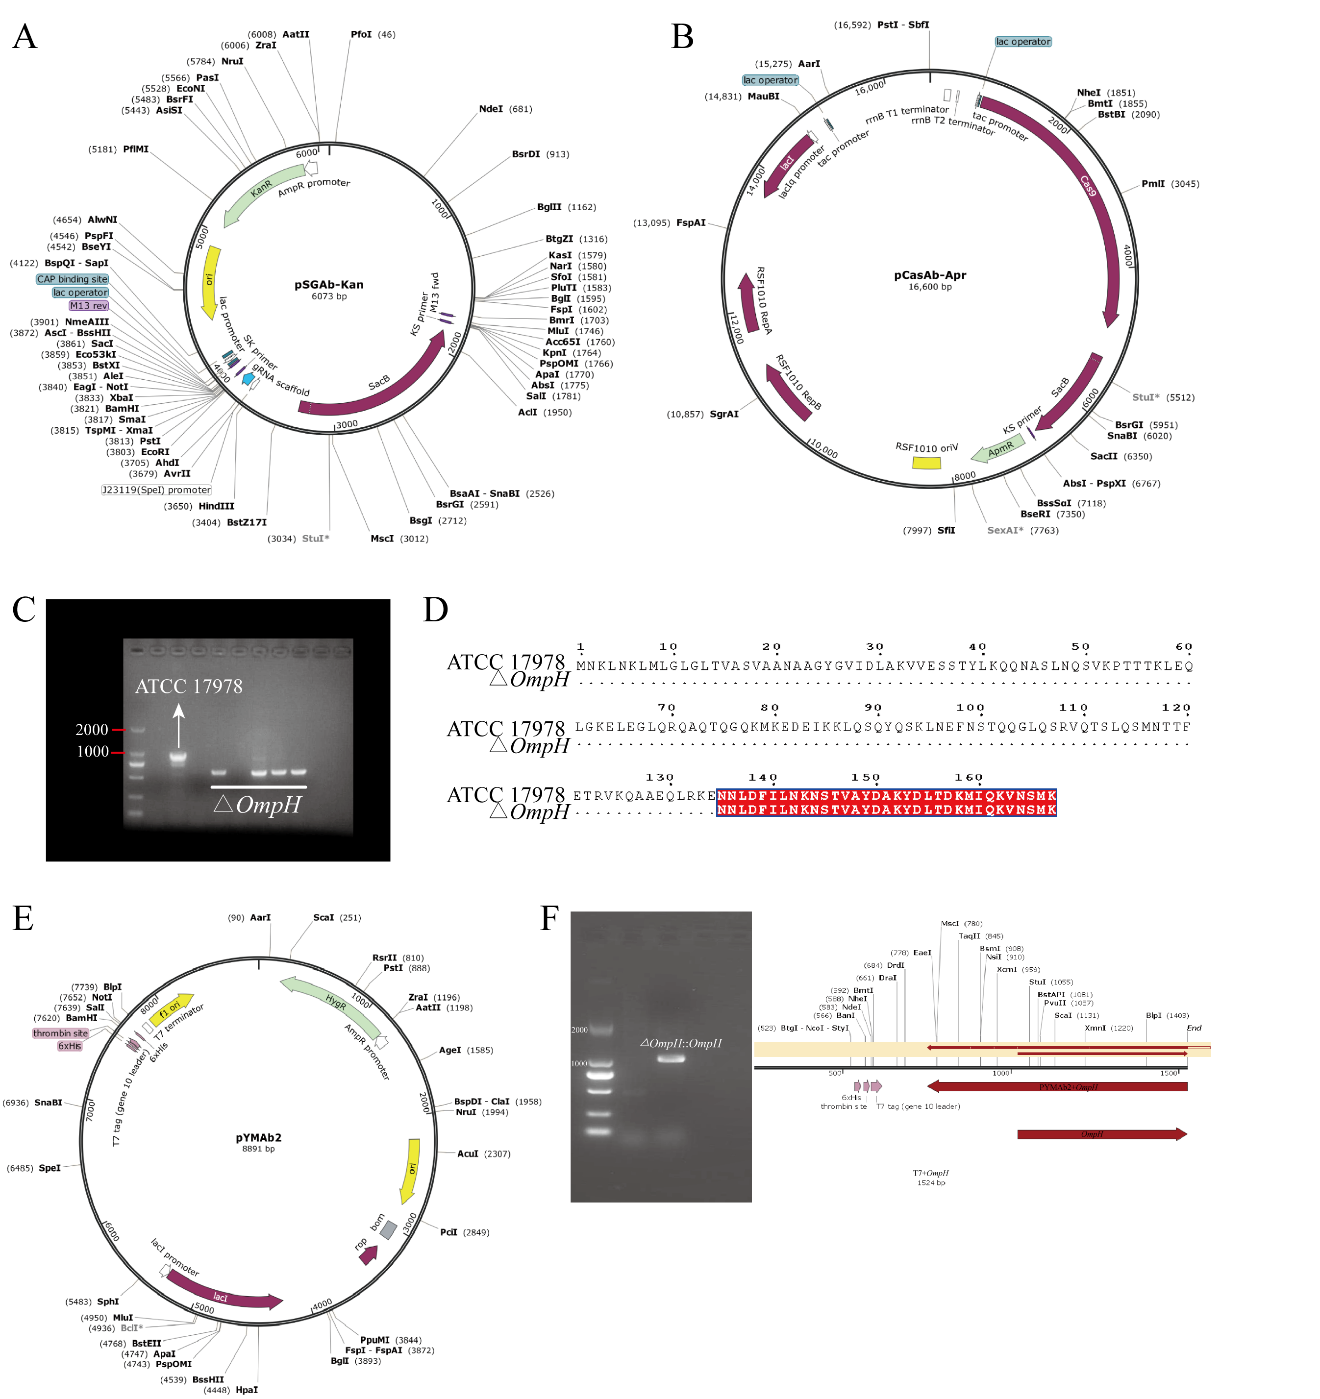


**Figure S7** Construction of knockout and complemented strains of *OmpH* gene. (**A**)The pSGAb plasmid map. (**B**)The pCasAb plasmid map. (**C**)The knockdown result. (**D**)The result of sequence comparison after knockdown. (**E**)The PYMAb2 plasmid map. (**F**)The result of backfill and sequencing results.


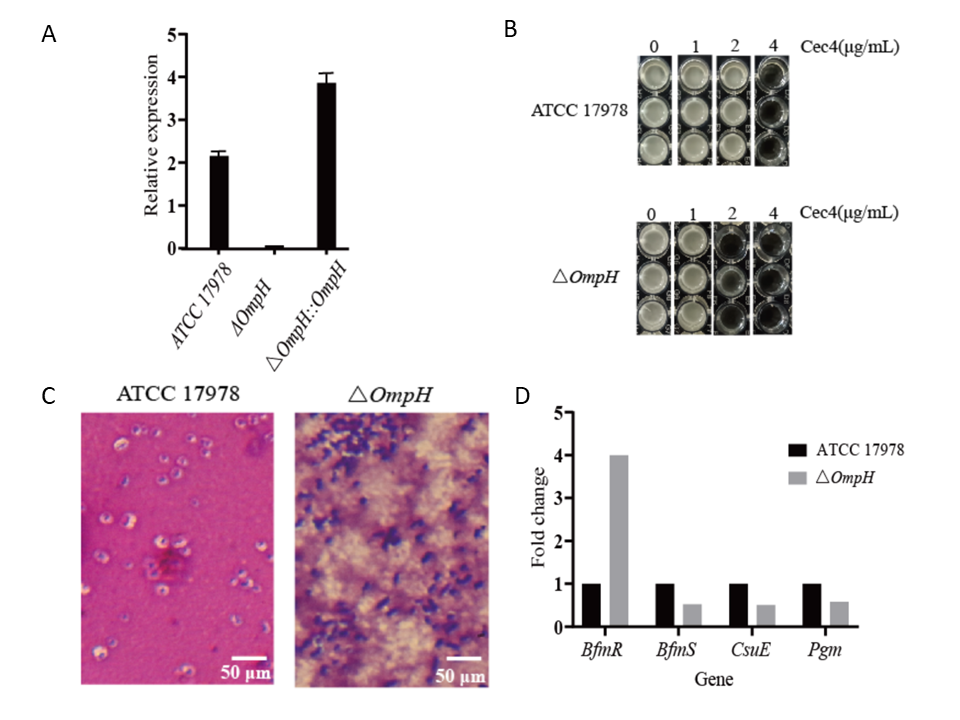


**Figure S8** Expression level of genes related to biofilm formation. (**A**) RT-qPCR was used to detect *OmpH* gene expression in ATCC 17978 wild strains, knockout strains and overexpressed strains. (**B**) The result of MIC against Cec4 before and after *OmpH* knockdown. (**C**) The staining of capsule before and after *OmpH* knockdown. (**D**) The expression of genes related to biofilm before and after *OmpH* knockdown detected by RT-qPCR.

Reference：

1. Pakharukova N, Tuittila M, Paavilainen S, Zavialov A. Methylation, crystallization and SAD phasing of the Csu pilus CsuC-CsuE chaperone-adhesin subunit pre-assembly complex from Acinetobacter baumannii. *Acta Crystallogr F Struct Biol Commun.* 2017;73(Pt 8):450-454.

2. Krasauskas R, Skerniškytė J, Armalytė J, Sužiedėlienė E. The role of Acinetobacter baumannii response regulator BfmR in pellicle formation and competitiveness via contact-dependent inhibition system. *BMC Microbiol.* 2019;19(1):241.

3. Upmanyu K, Haq QMR, Singh R. Factors mediating Acinetobacter baumannii biofilm formation: Opportunities for developing therapeutics. *Curr Res Microb Sci.* 2022;3:100131.
